# Supplementary material for: Effectiveness of Sun Protection Interventions Delivered to Adolescents in a Secondary School Setting: A Systematic Review
Source: J Skin Cancer. 2021 Mar 4;2021:6625761. doi: 10.1155/2021/6625761 (PMC7952177; doi:10.1155/2021/6625761)
Supplement: Supplementary Materials — Supplementary File 1: it is referred to in Section 2.2 “Searching Literature” search strategies for systematic review. Supplementary File 2: it is referred to in Section 4.1 “Study Quality” expanded data for Table 2 (studies identified in the systematic review and reviewed). Supplementary File 3: it is referred to in Section 4.1 “Study Quality” expanded data for Table 3 (studies identified in the systematic review but not reviewed (pilot/uncontrolled)). [file 6625761.f1.zip]

Archive with 4 entries (4 files):
- 6625761.f1/~$tails of supplementary files.docx
- 6625761.f1/J skin cancer supplementary file 1_10 feb 2021.docx
- 6625761.f1/J skin cancer supplementary file 2_10 feb 2021.docx
- 6625761.f1/J skin cancer supplementary file 3_10 feb 2021.docx
